# Supplementary material
Source: PubMed Central journal article supplement (PMC1131877)
Supplement: pnas_102_suppl-1_6581__2.pdf [file pnas_102_suppl-1_6581__2.pdf]

**Table 4. Primer sequences for *HapSTRs* of Lake Malawi cichlids**

| Primer name        | Sequence 5'-3'                               | Source                                          |
|--------------------|----------------------------------------------|-------------------------------------------------|
| UNH001-STR-F3M13F  | CACGACGTTGTAAAACGACGCGTTTGCAGATTGGTCCGA      | This study                                      |
| UNH001-R           | CTGAAGTGTTTAAAAATAGTGTT                      | Direct submission by Kellog <i>et al.</i> (1)   |
| UNH001-SEQ-F2M13F  | CACGACGTTGTAAAACGACACCCCTGGTTCMATATTTGGA     | This study                                      |
| UNH001-SEQ-R1M13R  | GGATAACAATTTTCACACAGGTGAAACAGAAACCTCGCATC    | This study                                      |
| U66815-STR-F       | GGGTGAGACTGGCACACTAG                         | This study                                      |
| U66815-STR-R2M13F  | CACGACGTTGTAAAACGACGGGAGCACAGCAGAGCGTGT      | This study                                      |
| U66815-F2M13R      | GGATAACAATTTTCACACAGGTTCAGCTTGAAGTCTATTG     | This study                                      |
| AAUr1M13F          | CACGACGTTGTAAAACGACGATCTTGGAGAAGGCAGTGG      | This study                                      |
| U66815-SEQ-FM13R   | GGATAACAATTTTCACACAGGTAAATGGAGAGAGTTAGGT     | This study                                      |
| U66814-F-M13F      | CACGACGTTGTAAAACGACTCACTGAAGGACAAAGCAGGA     | Ref. 2                                          |
| U66814-R           | TTTTGCAGTAATCCACCGGA                         | This study                                      |
| U66814-LF-M13R     | GGATAACAATTTTCACACAGGTGGATGGTTTTCCCTTACACAGC | This study                                      |
| invU66814-L-M13F   | CACGACGTTGTAAAACGACTCCTGCTTTGTCTTCAGTGA      | This study                                      |
| U14396-STR-F2M13F  | CACGACGTTGTAAAACGACCAAACCTGTAGATATTGACAG     | This study                                      |
| U14396-STR-R3      | TCCGTTGCCAAGAAGTGAAC                         | This study                                      |
| U14396-SEQ-F1M13F  | CACGACGTTGTAAAACGACTAAACACACCTGGTATGATC      | This study                                      |
| U14396-SEQ-R4M13R  | GGATAACAATTTTCACACAGGGCAGTTAGATGATTACATGT    | This study                                      |
| DXTUCA3-F          | ACCGAAAAGAAAGAGCCT                           | Direct submission by Sltmann <i>et al.</i> (3) |
| DXTUCA3-STR-RM13F  | CACGACGTTGTAAAACGACCCGTTTTTACCGTGTCACTCC     | This study                                      |
| DXTUCA3-R3         | AAACCCTTAAAGTAATAAAAA                        | This study                                      |
| DXTUCA3-SEQ-F2M13F | CACGACGTTGTAAAACGACCGCTTCCCTCGCTCCCGTG       | This study                                      |
| DXTUCA-R3M13R      | GGATAACAATTTTCACACAGGAAACCCTTAAAGTAATAAAAA   | This study                                      |
| PZMSAT2-STR-F6M13R | GGATAACAATTTTCACACAGGATAACCTACATGAACAG       | This study                                      |
| PZMSAT2-R1         | AAGCAAAGGGTGTGAACTG                          | This study                                      |
| PZMSAT2-SEQ-F4M13R | GGATAACAATTTTCACACAGGAACAAGCCTTTGCAAATCCT    | This study                                      |
| PZMSAT2-SEQ-R5M13F | CACGACGTTGTAAAACGACTGTTTCATGTAGGTTATG        | This study                                      |

If a primer is the same or similar to that of the original primer sequences deposited in GenBank, the authors are represented in the source column. All the other primers designed by us are marked “this study.”

1. Kellog, K. A., Markert, J. A., Jr., Stauffer, J. & Kocher, T. D. (1995) *Proc. R. Soc. London Ser. B* **260**, 79–84.
2. Booton, G. C., Kaufman, L., Chandler, M. & Fuerst, P. A. (1996) in *Symposium Proceedings, International Congress on the Biology of Fishes*, eds. Donaldson, E. M. & MacKinlay, D. D. (Am. Fisheries Soc., Physiol. Sect., Vancouver, CA), Vol. 9, pp. 105–113.
3. Sltmann, H. & Mayer, W. E. (1997) in *Molecular Systematics of Fishes*, eds. Kocher, T. D. & Stepien, C. A. (Academic, New York), pp. 39–51.
